# Supplementary material
Source: PubMed Central journal article supplement (PMC3458674)
Supplement: JB.01136-12_zjb999091994so2.pdf [file JB.01136-12_zjb999091994so2.pdf]

**Supplemental Figure S1. SDS-PAGE analysis of sugar kinases from *T. maritima*.**

**A. TM0067 / KdgK**

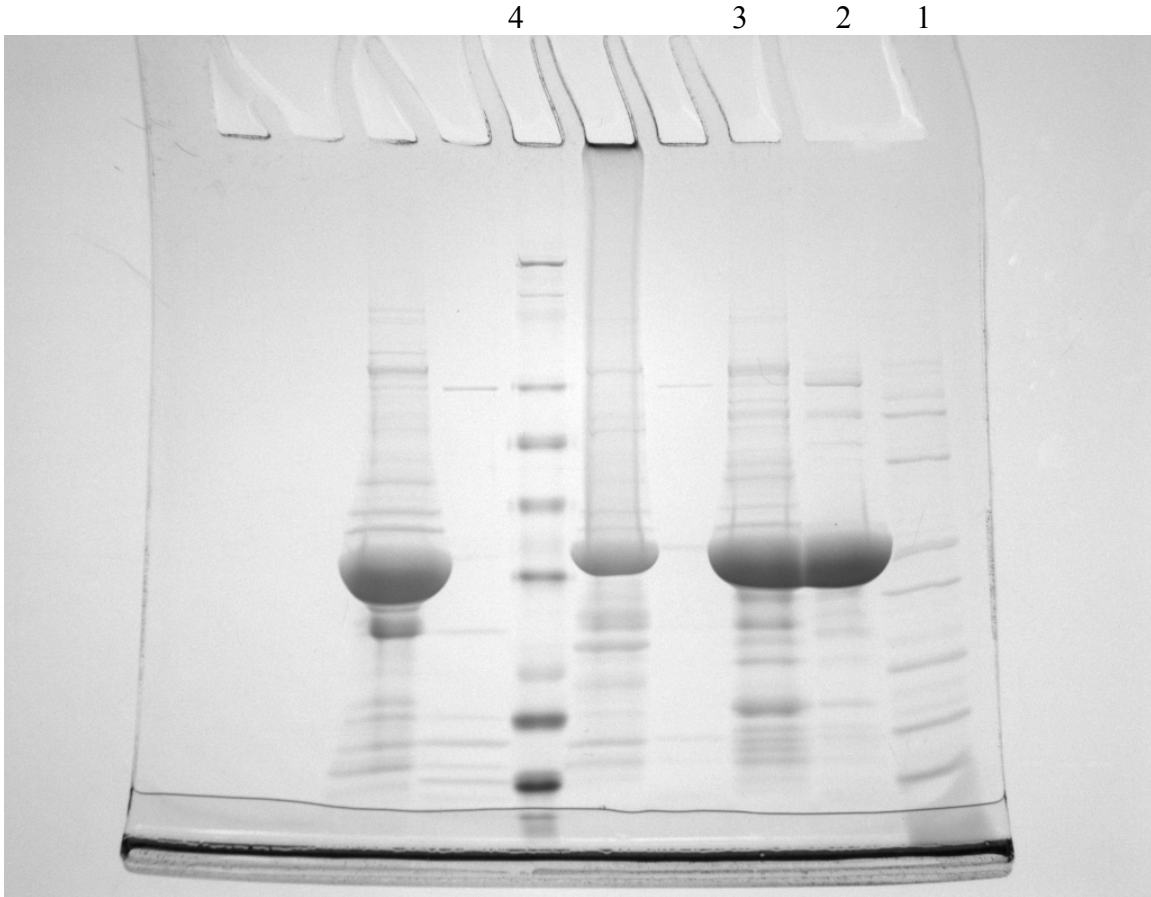

1&4: protein marker

2: TM0067 soluble part (10ul)

3: TM0067 insoluble part (10ul)

**B. TM0952 / Dr1K**

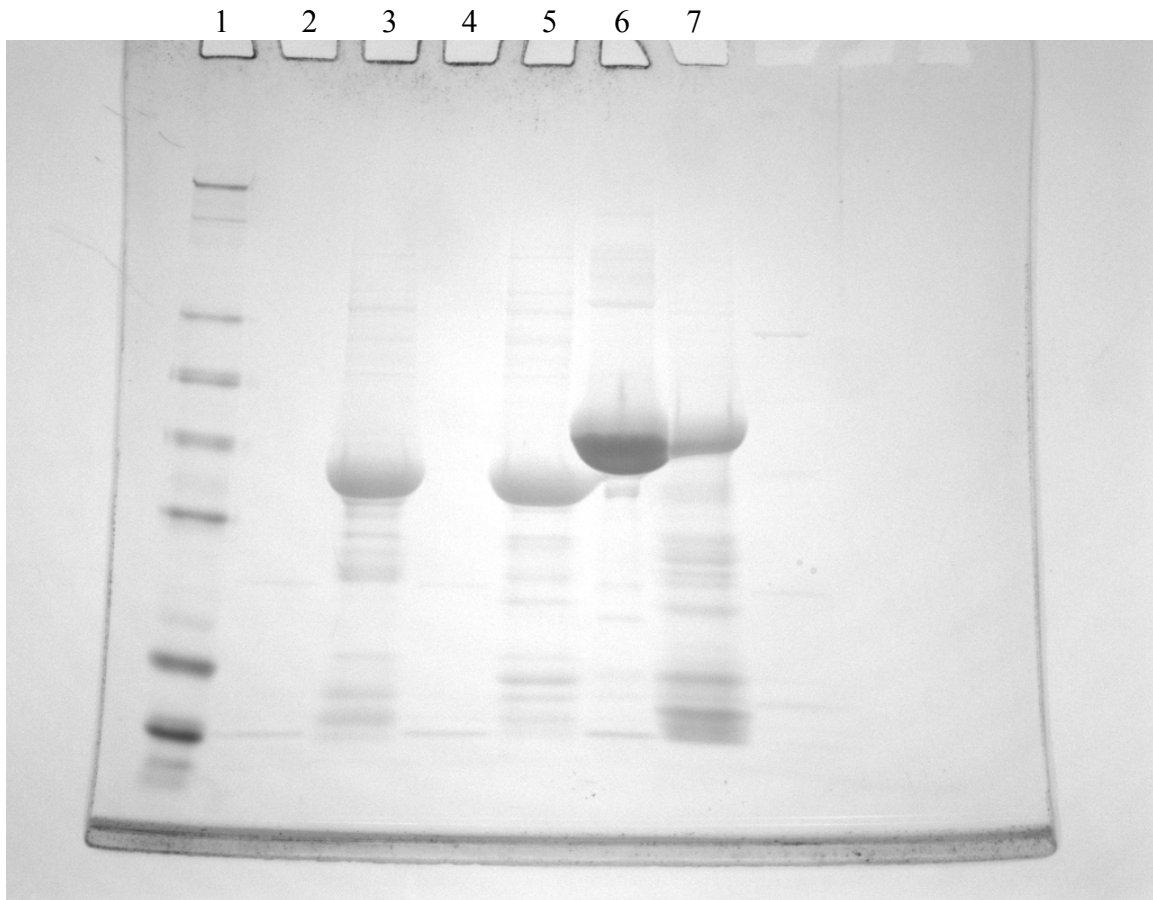

1: protein marker

6: TM0952 soluble part (10ul)

7: TM0952 insoluble part (10ul)

**C. TM0067 / KdgK, TM1190 / GalK, and TM1430 / GlpK**

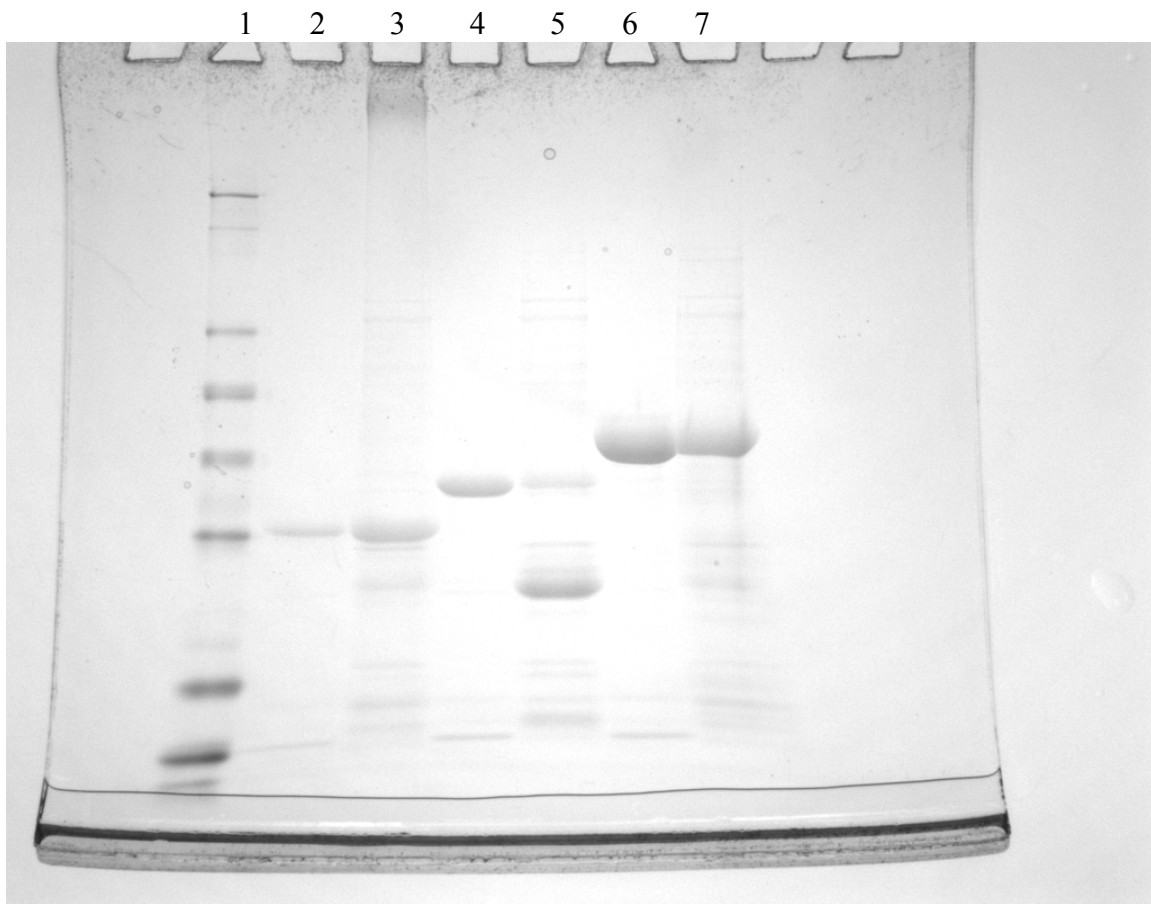

1: protein marker

2: TM0960 soluble part (10ul)

3: TM 0960 insoluble part (10ul)

4: TM1190 soluble part (10ul)

5: TM1190 insoluble part (10ul)

6: TM1430 soluble part (10ul)

7: TM1430 insoluble part (10ul)

```

      R L Y S K W K E A V S R S L G W E K R Stop
TM1430  AGGCTGTATTCAAAAATTGAAAAGAGGCAGTGTCTGAGATCCCTCGGATGGGAAAAACGATTGA
TRQ2_1322 AGGCTGTATTCAAAAATGGAAAAGAGGCAGTGTCTGAGATCCCTTGGATGGGAAAAACGATTGA
Tpet_1364 AGGCTGTATTCAAAAATGGAAAAGAGGCAGTGTCTGAGATCCCTTGGATGGGAAAAACAGTGA
CTN_1064  AGGTTGTATTCAAAAATGGAAAAGAGGCTGTGTCTGAGGTCTCTCGGATGGGAAAAGCAGTGA
*****

```

**Supplemental Figure S2. Multiple alignment of 3'-coding region of TM1430 and its orthologs in *Thermotoga* spp.**

The respective amino acids of TM1430 protein are shown on the top. The tryptophan-coding codon which has a nonsense mutation in the *T. maritima* genome is highlighted in gray. The stop codons are in bold font. Abbreviations for the Thermotogales genomes are given in Table 2.

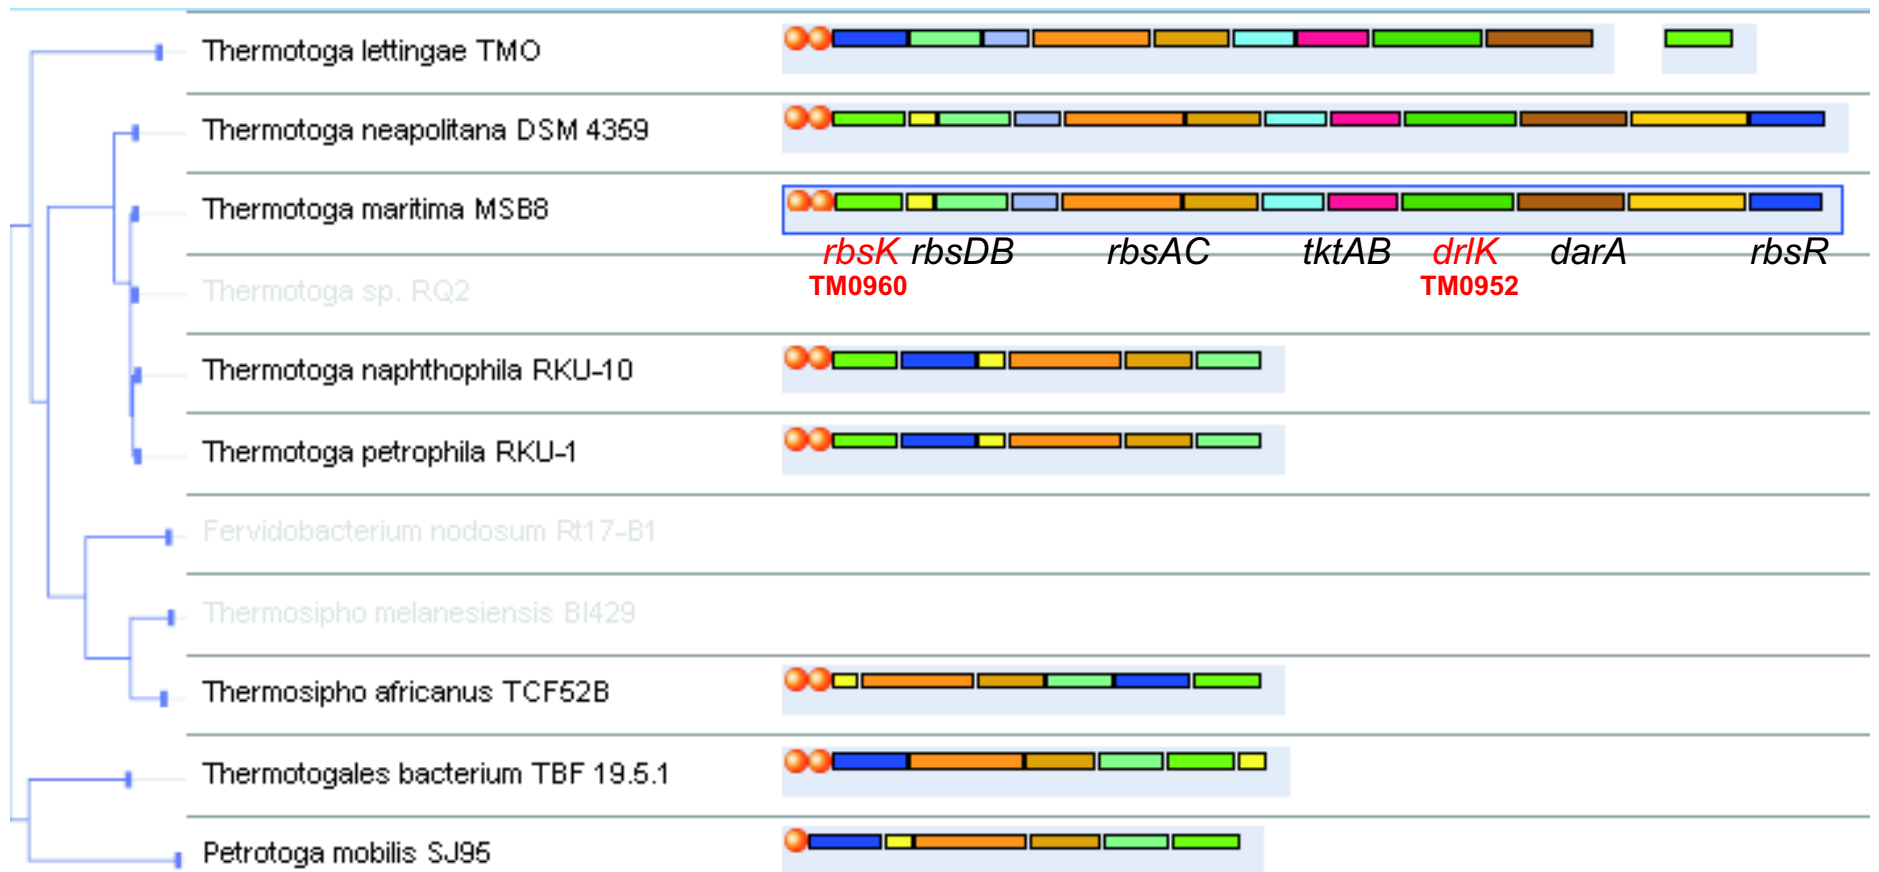

DNA binding motif of RbsR regulator:

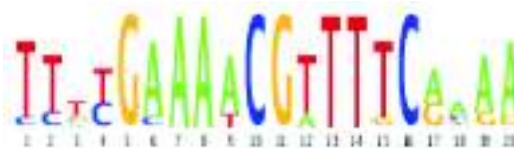

Supplemental Figure S3. Example of comparative genomics reconstruction of RbsR regulon in the Thermotogales.

**Supplemental Table S1. Primers and restriction sites used for cloning of *T. maritima* genes.**

| Gene                      | Plasmid              | Sites          | Primers <sup>1</sup>                                                                                                                     |
|---------------------------|----------------------|----------------|------------------------------------------------------------------------------------------------------------------------------------------|
| TM1190                    | pODC29               | BspHI/<br>PstI | F-5'-cgtggatc <u>ATGAAAGTGAAGGCACCAGGAAGAATAAAC</u> ;<br>R-5'-cctcagct <u>gcag</u> TTAGATTTTTTGAACACCGTCTGAAC                            |
| TM0952                    | pET28A               | NdeI/<br>Sal1  | F-5'- ggactctgcat <u>ATGTACGTTCTCGCAATAGATC</u> ;<br>R-5'- cgatg <u>tcgac</u> TCACTCGGTGAGTAGTTTTCTG                                     |
| TM0960                    | pODC29               | PciI/<br>Sal1  | F-5'-gcactctgcaac <u>ATGTTTCTAGTGATTTCCGTCGTG</u> ;<br>R-5'-cacgagg <u>tcgac</u> TTATAAATTCTTCAAAAACGCCTC                                |
| TM1430                    | pODC29               | Nco1/<br>Sal1  | F-5'- cgatgtcc <u>ATGgAATATGTTCTCTCTCTCGATCAAG</u> ;<br>R-5'- cgatg <u>tcgac</u> TCATTTTGAATACAGCCTCTCTC                                 |
| TM1430                    | pODC29<br>C-His6 tag | Nco1/<br>Sal1  | F-5'- cgatgtcc <u>ATGgAATATGTTCTCTCTCTCGATCAAG</u> ;<br>R-5 'GATCC <u>GTCGACCGTTTTTCCCATCCGAGGGATC</u>                                   |
| TM1430<br>mutagenesi<br>s | pODC29<br>C-His6 tag | Nco1/<br>Sal1  | F-5'- cgatgtcc <u>ATGgAATATGTTCTCTCTCTCGATCAAG</u> ;<br>R-5' GATCC <u>GTCGACCGTTTTTCCCATCCGAGGGATCTCG</u><br>ACACTGCCTCTTTCCATTTTGAATACA |

<sup>1</sup>Introduced restriction sites are underlined; nucleotides not present in the original *T. maritima* gene sequences are shown in lowercase.

Supplemental Table S2. Genes encoding sugar kinases in 12 Thermotogales genomes.

| Family  | Name  | <i>Thermotoga maritima</i> MSB8 | <i>Thermotoga</i> sp. RQ-2 | <i>Thermotoga petrophila</i> RKU-1 | <i>Thermotoga naphthophila</i> RKU-10 | <i>Thermotoga neapolitana</i> DSM 4359 | <i>Thermotoga lettingae</i> TMO | <i>Thermotoga thermarum</i> DSM 5069 | <i>Thermosipho africanus</i> TCF52B | <i>Thermosipho melanesiensis</i> BI429 | <i>Fervidobacterium nodosum</i> Rt17-B | <i>Petrotoga mobilis</i> SJ95 | <i>Kosmotoga olearia</i> TBF 19.5.1 | Functional role         | Biological process               |
|---------|-------|---------------------------------|----------------------------|------------------------------------|---------------------------------------|----------------------------------------|---------------------------------|--------------------------------------|-------------------------------------|----------------------------------------|----------------------------------------|-------------------------------|-------------------------------------|-------------------------|----------------------------------|
| FGGY    | GntK  | TM0443                          | TRQ2_0492                  | Tpet_0477                          | Tnap_0225                             | CTN_0229                               | -                               | -                                    | -                                   | -                                      | -                                      | -                             | -                                   | Gluconokinase           | 5-keto-D-gluconate utilization   |
| FGGY    | AraB  | TM0284                          | TRQ2_0653                  | Tpet_0628                          | Tnap_0916                             | CTN_0400                               | Tlet_1150                       | Theth_1115                           | -                                   | -                                      | -                                      | Pmob_1609                     | -                                   | L-ribulokinase          | L-arabinose utilization          |
| FGGY    | XylB  | TM0116                          | TRQ2_0831                  | Tpet_0808                          | Tnap_0746                             | CTN_0574                               | Tlet_0361                       | Theth_0157                           | -                                   | -                                      | -                                      | Pmob_0224                     | -                                   | Xylulokinase            | D-xylose utilization             |
| FGGY    | GlpK  | TM1430                          | TRQ2_1322                  | Tpet_1364                          | Tnap_1382                             | CTN_1064                               | Tlet_1098                       | Theth_0993                           | THA_662                             | Tmel_0617                              | Fnod_0409                              | Pmob_0284                     | Kole_0534                           | Glycerol kinase         | D-glycerol utilization           |
| FGGY    | DrkK  | TM0952                          | -                          | -                                  | -                                     | CTN_1624                               | Tlet_1331                       | -                                    | -                                   | -                                      | -                                      | -                             | -                                   | putative D-ribulokinase | putative D-arabinose utilization |
| FGGY    | RhaB  | TM1073                          | TRQ2_1744                  | Tpet_1671                          | Tnap_1694                             | CTN_1496                               | -                               | -                                    | -                                   | -                                      | -                                      | -                             | -                                   | Rhamnulokinase          | L-rhamnose utilization           |
| PfkB    | RbsK  | TM0960                          | -                          | Tpet_1789                          | Tnap_1790                             | CTN_1616                               | Tlet_1905                       | Theth_0467                           | THA_674                             | -                                      | -                                      | Pmob_0924                     | Kole_0601                           | Ribulokinase            | D-ribose utilization             |
| PfkB    | ScrK  | TM0296                          | TRQ2_0635                  | Tpet_0616                          | Tnap_0934                             | CTN_0387                               | -                               | -                                    | -                                   | -                                      | -                                      | Pmob_1154                     | Kole_0610                           | Fructokinase            | Mannitol utilization             |
| PfkB    | KdgK  | TM0067                          | TRQ2_0880                  | Tpet_0857                          | Tnap_0697                             | CTN_0626                               | Tlet_1863                       | -                                    | -                                   | -                                      | -                                      | -                             | -                                   | KDG kinase              | Glucuronate utilization          |
| PfkB    | IoIK  | TM0415                          | -                          | Tpet_0505                          | Tnap_0207                             | CTN_0254                               | -                               | Theth_1091                           | -                                   | -                                      | -                                      | -                             | Kole_0981                           | not determined          | Inositol utilization             |
| PfkB    | LacC  | TM0828                          | TRQ2_0099                  | Tpet_0099                          | Tnap_0099                             | CTN_1748                               | Tlet_1061                       | Theth_1239                           | THA_916                             | Tmel_0676                              | Fnod_0971                              | Pmob_0182                     | Kole_0346                           | not determined          | -                                |
| PfkB    | -     | TM0795                          | -                          | Tpet_0133                          | Tnap_0134                             | CTN_1783                               | Tlet_0330                       | Theth_1751                           | -                                   | -                                      | -                                      | Pmob_0041                     | Kole_0581                           | not tested              | -                                |
| COG2971 | BglK  | TM1280                          | TRQ2_1539                  | Tpet_1491                          | Tnap_1514                             | CTN_1292                               | Tlet_0044                       | Theth_0445                           | -                                   | -                                      | -                                      | -                             | -                                   | Glucosamine kinase      | Glucoside utilization?           |
| GHMP    | Galk  | TM1190                          | TRQ2_1628                  | Tpet_1562                          | Tnap_1581                             | CTN_1385                               | Tlet_1104                       | Theth_1358                           | THA_1581                            | Tmel_0425                              | Fnod_0415                              | Pmob_0830                     | Kole_0950                           | Galactokinase           | Galactose utilization            |
| ROK     | Glk   | TM1469                          | TRQ2_1363                  | Tpet_1323                          | Tnap_1340                             | CTN_1024                               | Tlet_0610                       | Theth_0713                           | THA_1446                            | Tmel_1141                              | Fnod_0088                              | Pmob_1217                     | Kole_1870                           | Glucokinase, hexokinase | Glycolysis                       |
| COG0469 | Pyk   | TM0208                          | TRQ2_0740                  | Tpet_0716                          | Tnap_0838                             | CTN_0477                               | Tlet_1962                       | Theth_1880                           | THA_1204                            | Tmel_0922                              | disrupted by f                         | Pmob_1917                     | Kole_1625                           | Pyruvate kinase         | Glycolysis                       |
| COG0126 | Pgk   | TM0689                          | TRQ2_0240                  | Tpet_0242                          | Tnap_0485                             | CTN_1897                               | Tlet_0997                       | Theth_0582                           | THA_1606                            | Tmel_1265                              | Fnod_0739                              | Pmob_1444                     | Kole_2021                           | Phosphoglycerate kinase | Glycolysis                       |
| COG2379 | GckA  | TM1585                          | TRQ2_1248                  | Tpet_1207                          | Tnap_1223                             | CTN_1169                               | Tlet_1724                       | Theth_1383                           | THA_302                             | Tmel_0085                              | Fnod_1253                              | Pmob_0534                     | Kole_1768                           | Glycerate-2-kinase      | Serine and glycerate utilization |
| PfkA    | PfkA1 | TM0209                          | TRQ2_0739                  | Tpet_0715                          | Tnap_0839                             | CTN_0476                               | Tlet_1961                       | Theth_1881                           | THA_1802                            | Tmel_1595                              | Fnod_1661                              | Pmob_1916                     | Kole_1624                           | 6-phosphofructokinase   | Glycolysis                       |
| PfkA    | PfkA2 | TM0289                          | TRQ2_0648                  | Tpet_0623                          | Tnap_0921                             | CTN_0395                               | Tlet_1950                       | Theth_1889                           | -                                   | -                                      | -                                      | -                             | -                                   | 6-phosphofructokinase   | Glycolysis                       |
